# Supplementary material
Source: PubMed Central journal article supplement (PMC6586509)
Supplement: NIHMS1522209-supplement-1.pdf [file NIHMS1522209-supplement-1.pdf]

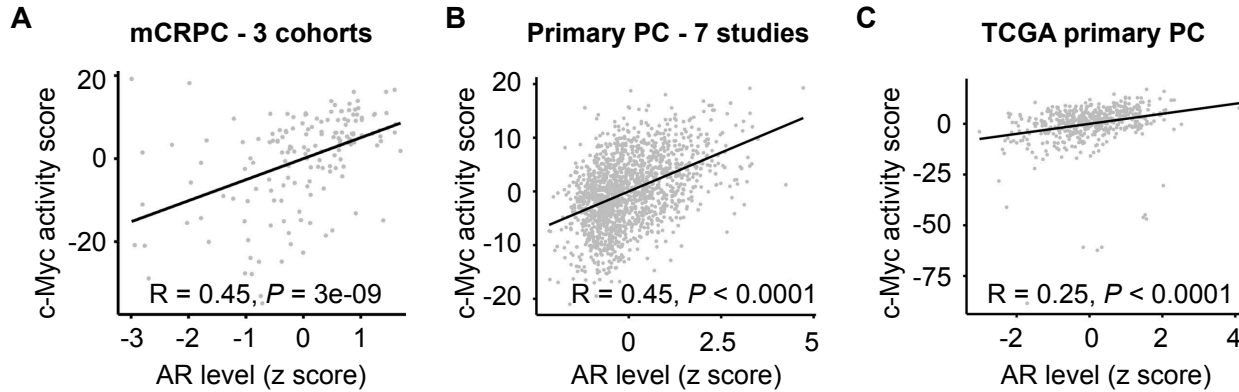

**Figure S1. c-Myc activity determined using the the Jung c-Myc-target signature positively correlates with AR level in human prostate cancer samples.** Pearson's correlation coefficient analysis showing a positive correlation between c-Myc activity score and AR level in 159 mCRPC samples from 3 cohorts (A), a meta dataset of 1642 primary prostate cancer samples (B), and the TCGA dataset of 500 primary prostate cancer samples (C). The c-Myc activity score was computed as the sum of z-scores for the Jung c-Myc-target signature.

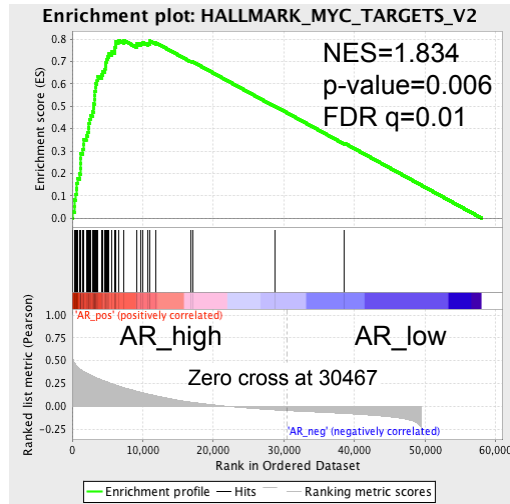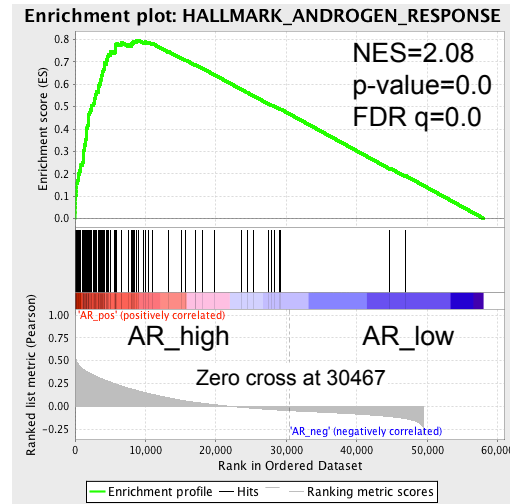

**Figure S2. GSEA showing enrichment of the hallmark Myc\_targets\_v2 and androgen\_response pathways in mCRPC samples (n = 159) that express a high level of AR.**

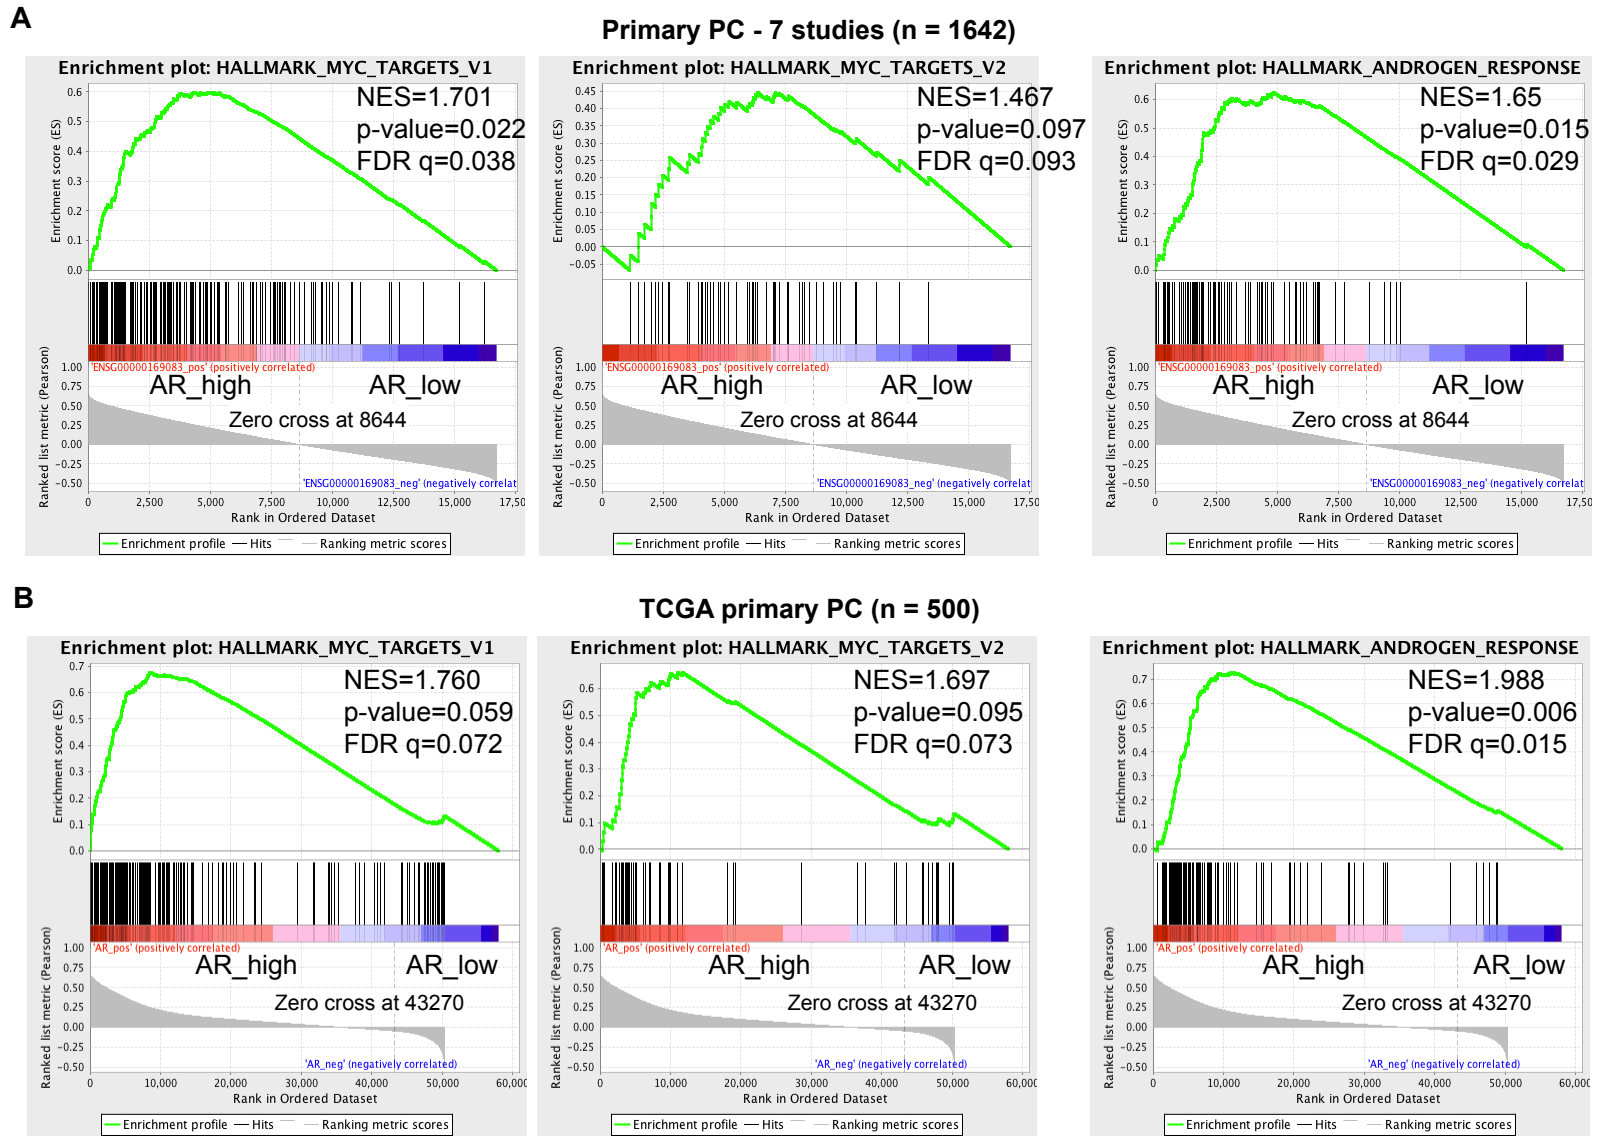

**Figure S3. GSEA showing enrichment of the hallmark Myc\_targets\_v1, Myc\_targets\_v2, and androgen\_response pathways in primary prostate cancer samples that express a high level of AR. A, a meta dataset of 1642 primary prostate cancer samples; B, the TCGA dataset of 500 primary prostate cancer samples.**

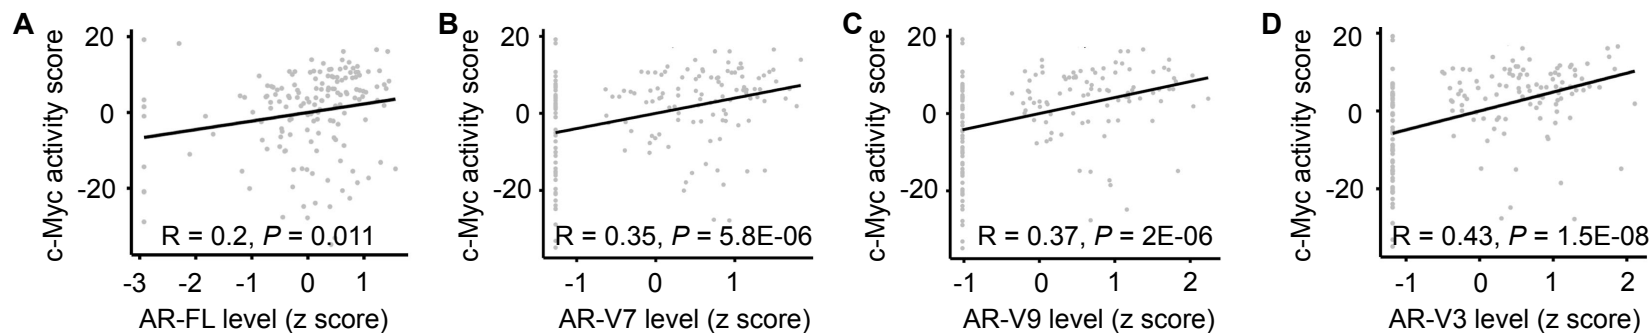

**Figure S4. c-Myc activity, calculated using the Jung c-Myc-target signature, positively correlates with AR-FL, -V7, -V9, and -V3 levels in 159 mCRPC samples in Pearson's correlation coefficient analysis.** The AR-FL, -V7, -V9, and -V3 levels were quantified as normalized number of RNA-seq reads spanning AR exons 7-8, 3-CE3, 3-CE5, and 2-CE4 splice junctions, respectively. The c-Myc activity score was computed as the sum of z-scores for the Jung c-Myc-target signature.

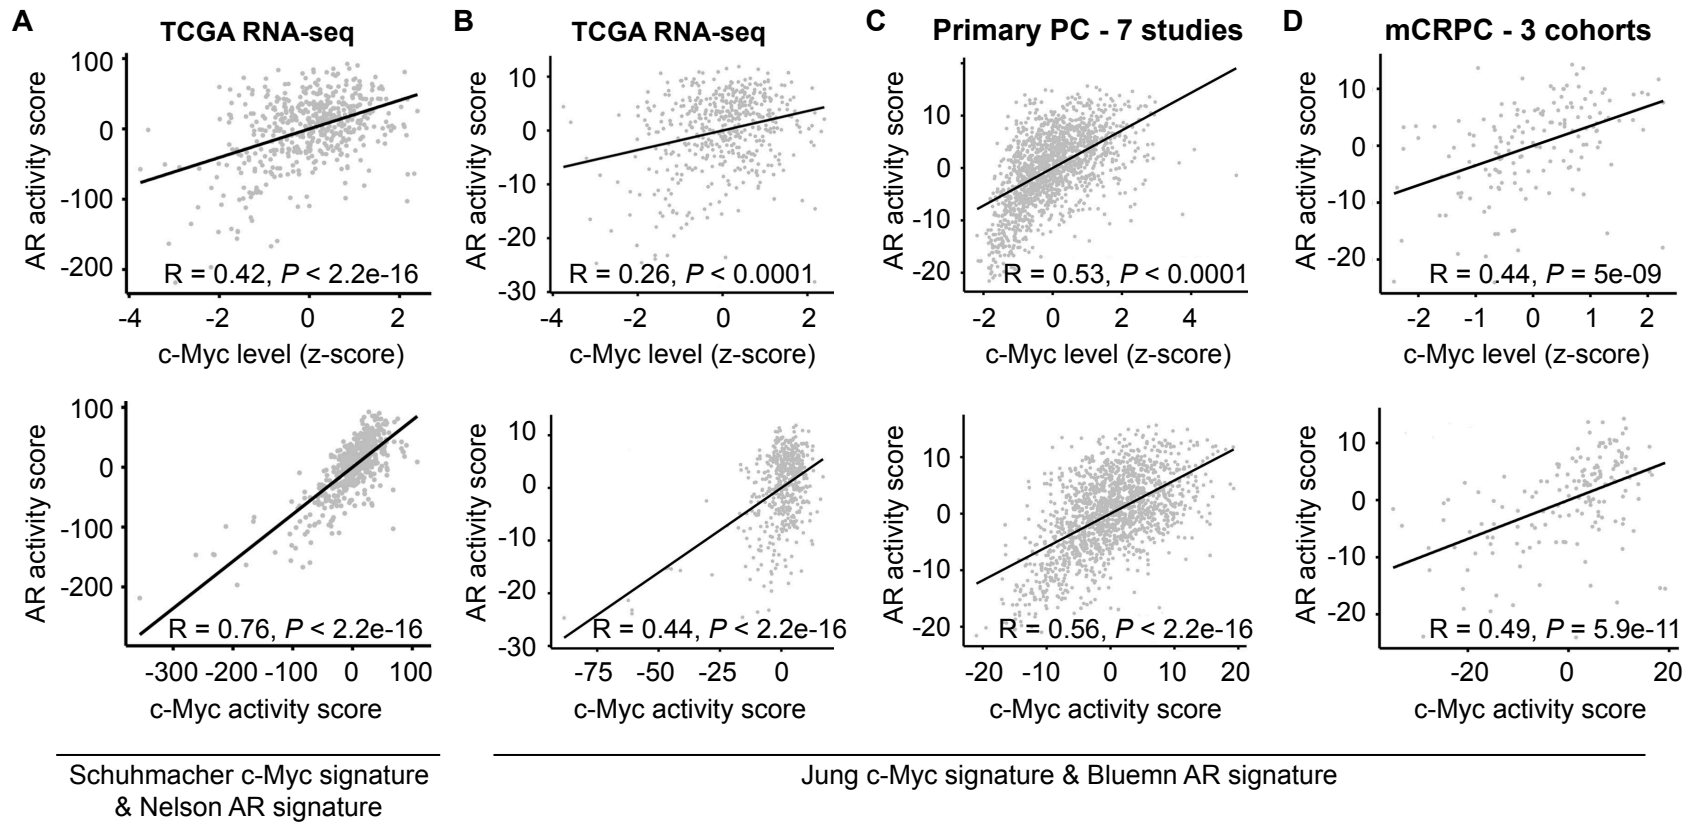

**Figure S5. c-Myc level and activity positively correlate with AR activity in human prostate cancer samples.** Pearson's correlation coefficient analysis showing a positive correlation between c-Myc level and AR activity score (top panels) and between c-Myc and AR activity scores (bottom panels) in the TCGA dataset of 500 primary prostate cancer samples (**A & B**), a meta dataset of 1642 primary prostate cancer samples (**C**), and 159 mCRPC samples from 3 cohorts (**D**). The c-Myc and AR activity scores were computed as the sum of z-scores for the Schuhmacher c-Myc-target signature and the Nelson AR-target signature, respectively, in **A** and as the sum of z-scores for the Jung c-Myc-target signature and the Bluemn AR-target signature, respectively, in **B to D**.

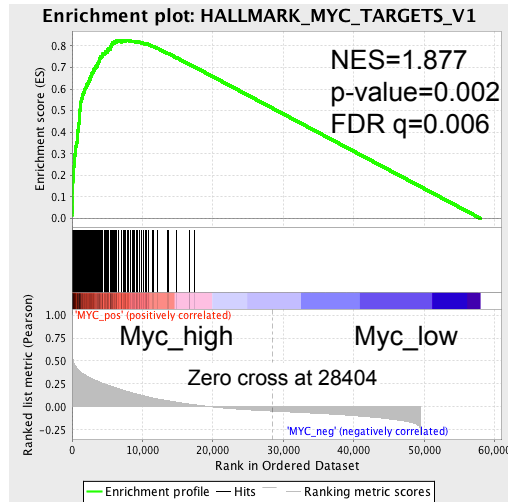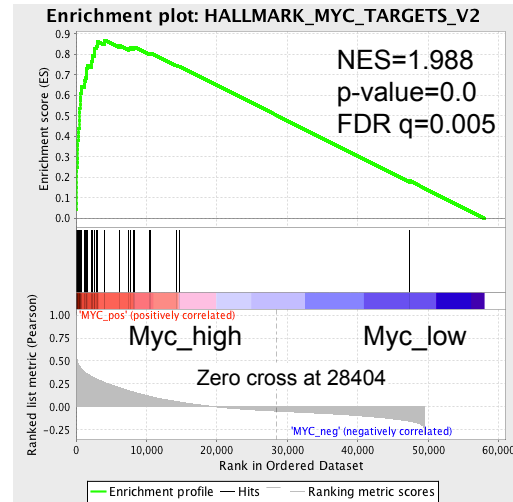

**Figure S6. GSEA showing enrichment of the hallmark Myc\_targets\_v1 and Myc\_targets\_v2 pathways in mCRPC samples (n = 159) that express a high level of c-Myc.**

**A****Primary PC - 7 studies (n = 1642)**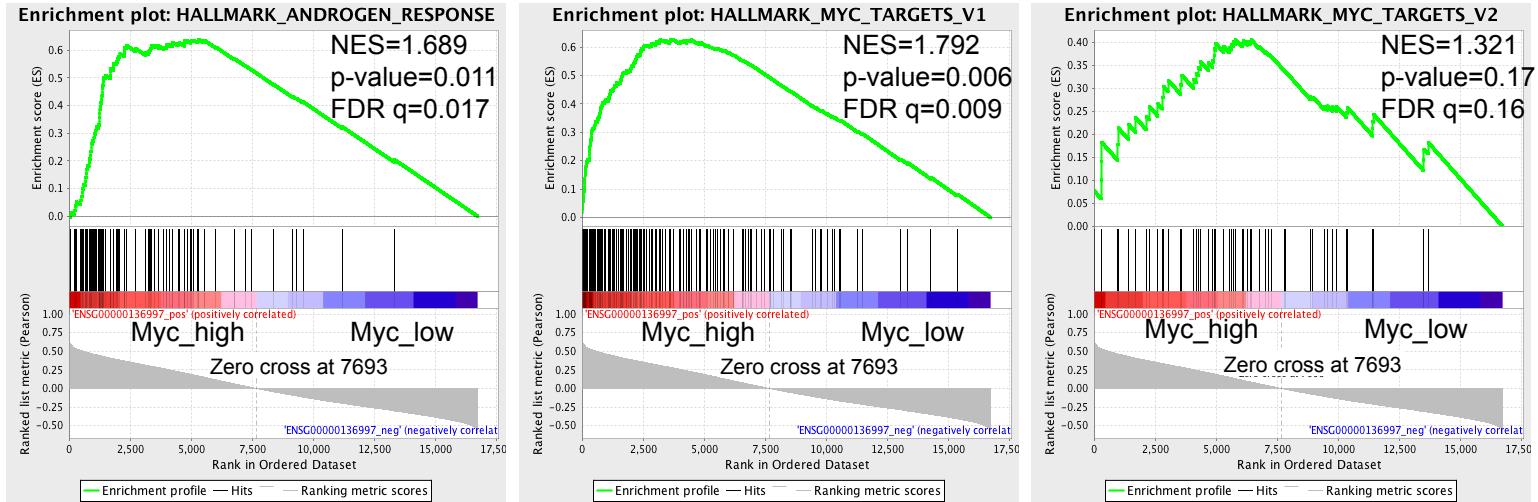**B****TCGA primary PC (n = 500)**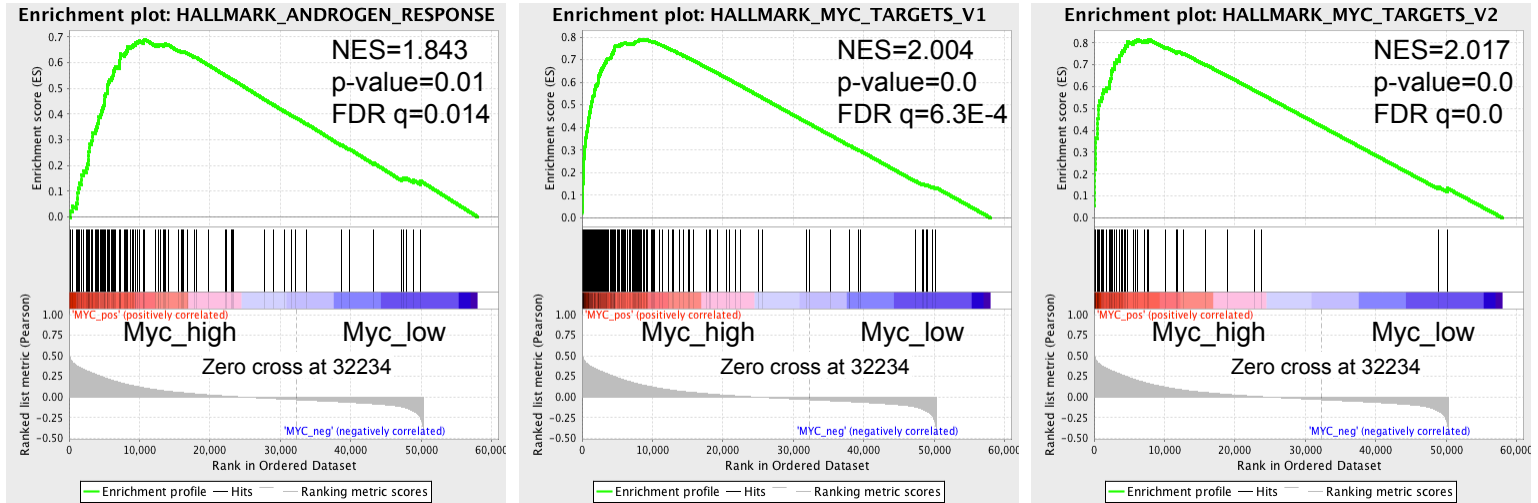

**Figure S7. GSEA showing enrichment of the hallmark androgen\_response, Myc\_targets\_v1, and Myc\_targets\_v2 pathways in primary prostate cancer samples that express a high level of c-Myc. A, a meta dataset of 1642 primary prostate cancer samples; B, the TCGA dataset of 500 primary prostate cancer samples.**

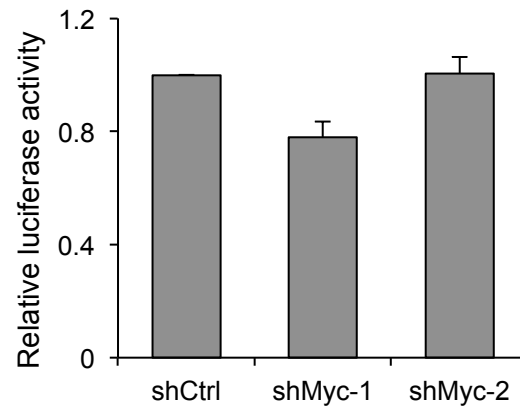

**Figure S8. Knockdown of c-Myc does not affect CMV-promoter activity.** Luciferase assay showing no change in CMV-promoter activity after c-Myc knockdown. At 24 h after shCtrl- or shMyc-lentivirus transduction, 22Rv1 cells were transiently transfected with the pGL4-CMV-Luc construct in bulk and reseeded in triplicate 24 h post transfection for luciferase assay.



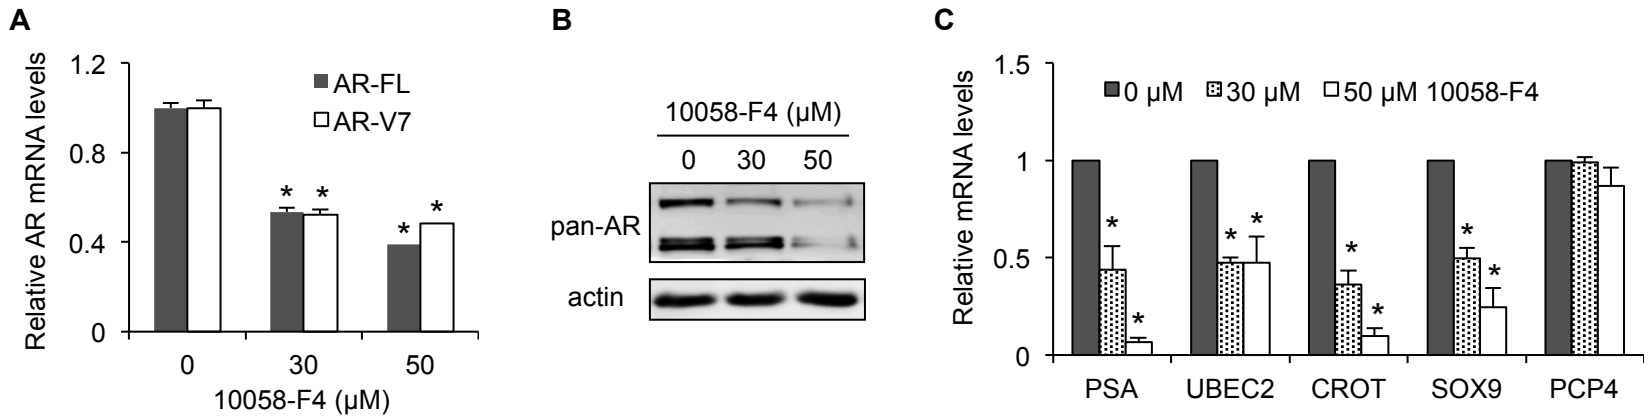

**Figure S9. c-Myc inhibition leads to reduced expression of AR-FL and AR-V7 as well as their target genes. A and B,** qRT-PCR (A) and Western blot analysis (B) showing a downregulated expression of AR-FL and AR-V7 mRNA and protein in 22Rv1 cells after treatment with the 10058-F4 c-Myc inhibitor. **C,** qRT-PCR analysis showing a reduced expression of AR-FL and AR-V7 targets, PSA, UBE2C, CROT, and SOX9, but not the non-AR target PCP4 in 22Rv1 cells after treatment with 10058-F4. \*,  $P < 0.05$  from the control cells.
